# Supplementary material
Source: publisher figshare collection journal article supplement (https://tandf.figshare.com/ndownloader/files/14244755)
Supplement: Supplementary file 1 [file 14244755]

Supplemental online material

**A new specimen with skull and vertebrae of *Najah rionegrina* (Lepidosauria: Ophidia) from the early Late Cretaceous of Patagonia**

Fernando Fabio Garberoglio, Raul Orencio Gómez, Sebastián Apesteguía and Michael Wayne Caldwell

**Character list**

**Changes from previous matrices**

**Figures of selected characters**

Fig. S1. Character 246

**Data matrix in nexus format**

**Additional references**

2

11

13

13

13

18

**Character list**

Symbols: *, not included in Cadlwell *et al*. (2015).

1. Tooth implantation on dentary: pleurodont (0); Alethinophidian (1).

2. Plicidentine: present (0); absent (1).

3. Maxillary and dentary teeth: relatively short conical, upright (0); robust, recurved (1); elongate needle-shaped, distinctly recurved (2).

4. Premaxillary dentition: present (0); absent (1).

5. Alveoli and base of teeth: not expanded transversely (0); wider transversely than anteroposteriorly (1).

6. Pterygoid teeth: absent (0); present (1).

7. Premaxilla: broadly articulated with maxilla (0); loosely contacting maxilla (1).

8. Transverse processes of premaxilla: curved backwards (0); extending straight laterally or anterolaterally (1).

9. Nasal process of premaxilla: elongate, approaching or contacting frontals (0); short, divides nasals only at anterior margin or not at all (1).

10. Dorsal (horizontal) lamina of nasal: relatively broad anteriorly, with narrow gap between lateral margin and vertical flange of septomaxilla (0); dorsal lamina of nasal distinctly tapering anteriorly, leaving wide gap between lateral margin and vertical flange of septomaxilla (1).

11. Medial flanges of nasal, articulation with median frontal pillars: present (0); absent (1).

12. Anterior margin of nasals: restricted to posteromedial margins of nares (0); extend anteriorly toward tip of rostrum (1).

13. Lateral flanges of nasals: articulate with anterior margin of frontals (0); separated from frontals (1).

14. Posterolateral margin of nasal: contacts posteromedian margin of prefrontal (0); elements in contact along most of their length (1); contact between elements with interfingering of nasal and prefrontal margins (2); nasals do not contact prefrontals (3).

15. Septomaxilla posterior dorsal process of lateral vertical flange: absent (0); short (1); long (2).

16. Septomaxilla articulation with median frontal pillars: absent (0); present (1).

17. Ventral portion of posterior edge of lateral flange of septomaxilla and opening of Jacobsen’s organ: located at level of posterior edge or behind (0); distinctly in front (1).

18. Vomeronasal cupola: fenestrated medially (0); closed medially by a sutural contact of septomaxilla and vomer (1).

19. Septomaxilla: forms lateral margin of opening of Jacobson’s organ (0); vomer extends into posterior part of lateral margin, restricting septomaxilla to anterolateral part of lateral margin of opening of Jacobson’s organ (1).

20. Vomeronasal nerve: does not pierce vomer (0); exits vomer through single large foramen (1); through cluster of small foramina (2).

21. Posterior ventral (horizontal) lamina of vomer: long, parallel edged (0); short, tapering to pointed tip (1).

22. Posterior dorsal (vertical) lamina of vomer: well developed (0); reduced or absent (1).

23. Prefrontal: articulates with frontal laterally (0); anterolaterally (1).

24. Lateral margin of prefrontal: slanting anteroventrally (0); positioned vertically (1).

25. Lacrimal foramen on prefrontal: not completely enclosed (0); enclosed by prefrontal (1).

26. Lateral foot process of prefrontal: absent (0); contacts maxilla only (1); maxilla and palatine (2); palatine only (3).

27. Medial foot process of prefrontal: absent (0); present, low (1); present, high (2).

28. Anterior/lateral flange of prefrontal covering nasal gland and roofing auditus conchae: absent (0); present (1).

29. Ventral margin of lateral surface of prefrontal: articulates with dorsal surface of maxilla (0); retains only posterior contact (1).

30. Dorsal lamina of prefrontal: contacts or forms overlapping contact with nasal posteromedially (0); remains separate from nasal (1).

31. Medial frontal pillars: absent (0), present (1).

32. Transverse horizontal shelf of frontal: developed and broadly overlapped by nasals (0); poorly developed and never broadly overlapped by nasals (1); absent (2).

33. Lacrimal: present (0); absent (1).

34. Postfrontal: present (0); absent (1)

35. Jugal: present (0); absent (1).

36. Ventral tip of jugal: remains separated by wide gap from ectopterygoid (0); contacts or closely approaches ectopterygoid, forming almost complete posterior margin of orbit (1).

37. Dorsal head of postorbital: fuses or articulates with posterodorsal surface of postfrontal (0); articulates with parietal (1).

38. Parietal: without lateral wings meeting postorbital bones (0); with lateral wings meeting postorbital bones (1).

39. Distinct lateral ridge of parietal: extending posteriorly from anterior lateral wing up to prootic: absent (0); present (1).

40. Frontoparietal suture: relatively straight (0); frontoparietal suture U-shaped (1).

41. Parietal margin of optic foramen: straight (0); concave (1).

42. Lateral margins of braincase open anterior to prootic (0); descending lateral processes of parietal enclose braincase (1).

43. Supratemporal processes of parietal: distinctly developed (0); not distinctly developed (1).

44. Parietal enters anterior aspect of base of basipterygoid process: absent (0); present (1).

45. Contact between parietal and supraoccipital: V-shaped with apex pointing anteriorly (0); straight transverse line (1); V-shaped with apex pointing posteriorly (2).

46. Ascending process of maxilla: tall, extending to dorsal margin of prefrontal (0); short (1); absent (2).

47. Small horizontal shelf on medial surface of anterior end of maxilla: present (0); absent (1).

48. Posterior end of maxilla: does not project beyond posterior margin of orbit (0); projects

moderately beyond posterior margin of orbit (1); projects distinctly beyond posterior margin of orbit, with broad flat surface (2).

49. Medial (palatine) process of maxilla: located in front of orbit (0); located below orbit (1).

50. Medial (palatine) process of maxilla: pierced (0); not pierced (1).

51. Anterior end of supratemporal: located behind or above posterior border of trigeminal foramen (0); anterior to posterior border of trigeminal foramen (1).

52. Supratemporal facet on opisthotic-exoccipital: flat (0); sculptured and delineated with projecting posterior rim that overhangs exoccipital (1).

53. Free-ending posterior process of supratemporal: absent (0); present (1).

54. Supratemporal: present (0); absent (1).

55. Anterior dentigerous process of palatine: absent (0); present (1).

56. Medial (choanal) process of palatine: forms extensive concave surface dorsal to ductus nasopharingeus (0); narrows abruptly to form curved finger-like process (1); forms short

horizontal lamina that does not reach vomer (2).

57. Choanal process of palatine: without expanded anterior flange articulating with vomer (0); with anterior flange (1).

58. Pterygoid contacts palatine: complex and finger-like articulations (0); tongue-in-groove joint (1); reduced to flap-overlap (2).

59. Palatine contact with ectopterygoid: present (0); absent (1).

60. Dentigerous process of palatine contact with vomer and/or septomaxilla posterolateral to opening for Jacobson’s organ: present (0); absent (1).

61. Maxillary process of palatine: anterior to posterior end of palatine (0); at posterior end of palatine (1).

62. Lateral (maxillary) process of palatine and maxilla: in well-defined articulation (0); loosely overlapping medial (palatine) process of maxilla, or absent (1).

63. Maxillary branch of trigeminal nerve: pierces lateral (maxillary) process of palatine (0); passes dorsally between palatine and prefrontal (1).

64. Vomerine (choanal) process of palatine: articulates broadly with posterior end of vomer (0); meets vomer in well-defined articular facet (1); touches or abuts vomer without articulation or remains separated from vomer (2).

65. Internal articulation of palatine with pterygoid: short (0); long (1).

66. Pterygoid tooth row: anterior to basipterygoid joint (0); tooth row reaches or passes level of basipterygoid joint (1).

67. Quadrate ramus of pterygoid: robust, rounded or triangular in cross-section, but without groove (0): blade-like and with distinct longitudinal groove for protractor pterygoidei (1).

68. Transverse (lateral) process of pterygoid: forms distinct, well-defined lateral projection (0); gently curved lateral expansion of pterygoid, or absent (1).

69. Lateral edge of ectopterygoid straight (0); angulated at contact with maxilla (1).

70. Anterior end of ectopterygoid: restricted to posteromedial edge of maxilla (0); invades dorsal surface of maxilla (1).

71. Pterygoid attached to basicranium: by strong ligaments at palatobasal articulation (0); pterygoid free from basicranium in dried skulls (1).

72. Quadrate: slender (0); broad (1).

73. Quadrate: slanted clearly anteriorly, posterior tip of pterygoid dislocated anteriorly from mandibular condyle of quadrate (0); positioned slight anteriorly or vertically (cephalic condyle positioned behind or at same level of mandibular condyle) (1); slanted posteriorly (cephalic condyle positioned in front of mandibular condyle) (2).

74. Cephalic condyle of quadrate: elaborated into posteriorly projecting suprastapedial process (0); suprastapedial process absent or vestigial (1).

75. Stapedial footplate: broad and massive (0); narrow and thin (1).

76. Stylohyal: not fused to quadrate (0); fuses to posterior tip of suprastapedial process (1); fuses to ventral aspect of reduced suprastapedial process (2); stylohyal fuses to quadrate shaft (3).

77. Stapedial shaft: straight (0); angulated (1).

78. Stapedial shaft: slender and longer than diameter of stapedial foot-plate (0); thick, and equal to, or shorter than diameter of stapedial foot-plate (1).

79. Paroccipital process of otooccipital: well developed and laterally projected (0); reduced to short projection or absent (1).

80. Juxtastapedial recess defined by crista circumfenestralis: absent (0), present but open posteriorly (1); present and closed posteriorly (2).

81. Crista circumfenestralis: exposes most of stapedial footplate (0); converges upon stapedial footplate (1).

82. Crista interfenestralis: does not form individualized component in ventral rim of crista circumfenestralis (0); does form individualized component in ventral rim of crista circumfenestralis (1).

83. Jugular foramen: exposed in lateral view by crista tuberalis (0); concealed in lateral view by crista tuberalis (1).

84. Otooccipitals: do not contact each other dorsally (0); contact each other dorsally (1).

85. Otooccipital posterolateral processes: short and narrow, do not extend toward posterior margin of occipital condyle (0); wider than condyle and long, combine with crista tuberalis to extend to approximate posterior margin of occipital condyle (1).

86. Supraoccipital contact with prootic: with narrow (0); broad (1).

87. Prootic exclusion of parietal from trigeminal foramen: absent (0); present (1).

88. Laterosphenoid: absent (0): present (1).

89. Prootic ledge underlap of posterior trigeminal foramen: absent (0); present (1).

90. Prootic: exposed in dorsal view medial to supratemporal or to supratemporal process of parietal (0); fully concealed by supratemporal or parietal in dorsal view (1).

91. Exit hyomandibular branch of facial nerve inside opening for mandibular branch of trigeminal nerve: absent (0); present (1).

92. Vidian canal: does not open intracranially (0); open intracranially (1).

93. Anterior opening of Vidian canal: single (0); divided (1).

94. Sella turcica: bordered posteriorly by well-developed dorsum sellae (0); dorsum sellae low (1); dorsum sellae not developed, sella turcica with shallow posterior margin (2).

95. ‘Lateral wings of basisphenoid’: absent (0); present (1).

96. Ventral surface of basisphenoid: smooth (0); with weakly developed sagittal crest from which protractor pterygoidei originates (1); with strongly projecting sagittal crest (2).

97. Basioccipital: contributes to ventral margin of foramen magnum (0); basioccipital excluded by medial contact of otooccipitals (1).

98. Basisphenoid-basioccipital suture: smooth (0); transversely crested (1).

99. Basipterygoid (= basitrabecular) processes: present (0); absent (1).

100. Crista trabeculares: short and or indistinct (0); elongate and distinct in lateral view (1).

101. Cultriform process of parabasisphenoid: does not extend anteriorly to approach posterior margin of choanae (0); approaches posterior margin of vomer (1).

102. Parabasisphenoidal rostrum behind optic foramen: narrow (0); broad (1).

103. Parabasisphenoid rostroventral surface: flat or broadly convex (0); concave (1).

104. Basioccipital meets parabasisphenoid: suture located at level of fenestra ovalis (0); located at or behind trigeminal foramen (1).

105. Parasphenoid rostrum interchoanal process: absent (0); broad (1); narrow (2).

106. Anteromedial margin of dentaries: symphyseal articular facet (0); no symphyseal facet (1).

107. Posterior dentigerous process of dentary: absent (0); present, short (1); present, long (2).

108. Medial margin of adductor fossa: relatively low and smoothly rounded (0); forms distinct dorsally projecting crest (1).

109. Mental foramina on lateral surface of dentary: two or more (0); one (1).

110. Coronoid process of coronoid bone: high, tapering distally (0); high, with rectangular shape (1); low, not exceeding significantly coronoid process of compound bone (2).

111. Coronoid bone: present (0); absent (1).

112. Posteroventral process of coronoid: present (0); absent (1).

113. Coronoid process on lower jaw: formed by coronoid bone only (0); or by coronoid and compound bone (1); or by compound bone only (2) (i.e. coronoid absent).

114. Posdentary elements: presence of separate elements (0); fusion of surangular /articular into compound bone (1).

115. Chevrons: present (0); absent (1).

116. Hemapophyses: absent (0); present (1).

117. Hypapophyses: restricted to anterior-most precloacal vertebrae (0); present throughout precloacal skeleton (1).

118. Para-diapophysis: confluent (0); separated into dorsal and ventral facet (1).

119. Prezygapophyseal accessory processes: absent (0); present (1).

120. Subcentral paralymphatic fossae on posterior precloacal vertebrae: absent (0); present (1).

121. Subcentral foramina: absent (0); present, consistently small (1); present, of variable size (2).

122. Well-developed, consistently distributed paracotylar foramina: absent (0); present (1).

123. Ventral margin of centra: smooth (0); median prominence from cotyle to condyle (1).

124. Axis intercentrum: not fused to anterior region of axis centrum (0); fused (1).

125. Neural spine height: well-developed process (0); low ridge or absent (1).

126. Posterior margin of neural arch: shallowly concave in dorsal view (0); with deep V-shaped embayment in dorsal view (1).

127. Cotyle shape of precloacal vertebrae: oval (0); circular (1).

128. Parazygantral foramen: absent (0); present (1).

129. Lymphapophyses: absent (0); present (1).

130. Lymphapophyses: three or fewer (0); three lymphapophyses and one forked rib (1); more than three lymphapophyses and one forked rib (2).

131. Sacral vertebrae: present (0); absent (1).

132. Position of synapophyses in relation to lateral edge of prezygapophyses: at same level or slightly more projected laterally (0); clearly medial to edge of prezygapophyses (1).

133. Pachyostotic vertebrae: absent (0); present (1).

134. Precloacal vertebrae number: fewer than 100 (0); more than 100 (1).

135. Caudal vertebrae number: greater than 50% of precloacal number (0); approximately 10% or less than precloacal number (1).

136. Tuber costae absent from ribs (0), tuber costae present (1).

137. Pectoral girdle and forelimbs: present (0); absent (1).

138. Tibia, fibula, and hind foot: present (0); absent (1).

139. Trocanter externus: present (0); absent (1).

140. Pelvis: external to sacral-cloacal ribs (0); internal to sacral-cloacal ribs (1).

141. Ilium and pubis length: ilium longer than pubis (0); ilium and pubis of same size (1); pubis much longer than ilium (2).

142. Pelvic elements: with strongly sutured contact (0); with weak (cartilaginous) contact (1); fused together (2).

143. Pelvic elements: present (0); absent (1).

144. Medial vertical flanges of nasals: absent (0); present (1).

145. Preorbital ridge: dorsally exposed (0); overlapped by prefrontal (1).

146. Lateral foot process of prefrontal: articulates with lateral edge of maxilla via thin anteroposteriorly directed lamina (0); articulates with maxilla via large contact that runs from lateral to medial dorsal surface of maxilla (1).

147. Medial finger-like process of ectopterygoid articulating with medial surface of maxilla: present (0); absent (1).

148. Posterolateral corners of basisphenoid: strongly ventrolaterally projected (0); not projected (1).

149. Basioccipital: expanded laterally to form floor of recessus scalae tympani (0); excluded from floor of recessus scalae tympani by otooccipital (1).

150. Frontal subolfactory process: absent or present as simple horizontal lamina (0); present and closing tractus olfactorius medially (1).

151. Ectopterygoid contact with pterygoid: restricted to transverse (lateral) process of pterygoid (0); contact expanded significantly on dorsal surface of pterygoid body (1).

152. Maxillary process of palatine: main element bridging contact with maxilla and palatine in ventral view (0); covered ventrally by expanded palatine process of maxilla (1).

153. Coronoid bone contributes to anterior margin of adductor fossa: present (0); absent (1).

154. Coronoid bone: sits mostly on dorsal and dorsomedial surfaces of compound bone, being exposed in both lateral and medial views of mandible (0); applied to medial surface of compound bone (1).

155. Teeth, implantation: interdental ridges absent (0): interdental ridges present (1).

156. Teeth, replacement: replacement teeth lie vertically (0); lie horizontally in jaws (1).

157. Teeth, replacement: single replacement tooth per tooth position (0); two or more replacement teeth per tooth position (1).

158. Teeth, attachment: ankylosed to jaws (0) teeth loosely attached by connective tissue (1).

159. Teeth, size: crowns isodont or enlarged at middle of tooth row (0) crowns large anteriorly, and decrease in size posteriorly (1); anterior teeth conspicuously elongate, length of crown significantly exceeds height of dentary at midlength (2).

160. Premaxilla: teeth borne medially on premaxilla (0); teeth absent from midline of premaxilla (1).

161. Premaxilla: ascending process transversely expanded, partly roofing external nares (0); ascending process mediolaterally compressed, blade-like or spine-like (1).

162. Premaxilla: premaxilla medial to maxillae (0); located anterior to maxillae (1).

163. Prefrontal: prefrontal socket for dorsal peg of maxilla absent (0); present (1).

164. Prefrontal extends medially across frontal for more than 75% of width of frontal: absent (0); present (1).

166. Frontal: nasal processes of frontal project between nasals (0); nasal processes absent (1).

167. Frontals: frontals taper anteriorly, distinct interorbital constriction (0); frontals broad anteriorly, interorbital region broad (1).

168. Frontal: subolfactory process abuts prefrontal in immobile articulation (0); subolfactory process articulates with prefrontal in mobile joint (1); subolfactory process with distinct lateral peg or process that clasped dorsally and ventrally by prefrontal (2).

169. Frontals and parietals: do not contact ventrally (0); descending wings of frontals and parietals contact ventrally to enclose optic foramen (1).

170. Parietal, sagittal crest: absent (0); present posteriorly but not anteriorly, and extending for no more than 50% of parietal midline length (1); present anteriorly and posteriorly, and extending more than 50% of parietal midline length (2).

171. Parietal: narrow (0); inflated (1).

173. Skull, postorbital region relative length: short, less than half (0); elongate, half or more (1).

174. Supraoccipital region of skull: nuchal crests absent (0); present (1).

175. Supratemporal: supratemporal short, does not extend posterior to paroccipital process (0); elongate, extending well beyond paroccipital process (1).

176. Maxilla: palatine process short, weakly developed (1); palatine process long, strongly projecting medially (1).

177. Maxilla: ascending process projects up strongly, caudal margin inclined steeply relative to maxilla (0); facial process weakly projecting, caudal margin of facial process lies at angle of 30º to horizontal or less (1).

178. Maxilla, premaxillary process: medial projection articulating with vomers present (0); premaxillary process does not contact vomers (1).

179. Maxilla, number of mental foramina: 5 or more (0); 4 or fewer (1).

180. Maxilla, supradental shelf development: extending full length of maxilla (0); reduced anterior to palatine process (1).

181. Maxilla: medial surface of facial process with distinct naso-lacrimal recess demarcated dorsally by anteroventrally trending ridge: (0) present; (1) absent.

182. Maxilla: medial surface of facial process with well-defined fossa for lateral recess of nasal capsule: present (0); reduced and present as small fossa on back of facial process (1); absent, fossa for lateral recess developed entirely on prefrontal (2).

183. Maxilla: extensive contact of dorsal margin of maxilla with nasal (0); nasal-maxilla contact lost (1).

184. Maxilla: maxilla overlaps prefrontal laterally in tight sutural connection (0); overlap reduced, mobile articulation (1).

185. Maxilla: excluded from anteroventral margin of orbit by jugal (0); maxilla forms anteroventral margin of orbit (1).

186. Maxilla: palatine process of maxilla projects medially (0); palatine process of maxilla downturned (1).

187. Maxilla: superior alveolar foramen: positioned near middle of palatine process, opening posterodorsally (0); positioned near anterior margin of palatine process, opening medially (1).

188. Maxilla, accessory foramen posterior to palatine process: absent (0); present (1).

189. Maxilla, ectopterygoid process: absent (0); present (1).

190. Maxilla: articulates with distally expanded postorbital element to form complete postorbital bar: present (0); absent (1).

191. Maxilla: 15 or more maxillary teeth (0); fewer than 15 maxillary teeth (1).

192. Postfrontal: anterior and posterior processes clasping frontals and parietals (0); anterior and posterior processes present, but postfrontal abuts frontals and parietals (1); anterior and posterior processes absent (2).

193. Supratemporal: free caudal end of supratemporal projects posteroventrally (0); posteriorly or posterodorsally (1).

194. Quadrate, lateral conch: present (0); absent (1).

195. Quadrate, maximum length relative to proximal width: quadrate elongate, maximum length at least 125% of maximum width of quadrate head (0); quadrate short, length less than 125% of width of quadrate head (1).

196. Quadrate, proximal end platelike: absent (0); present (1).

197. Palatine, palatine teeth small relative to lateral teeth (0); or enlarged, palatine teeth at least half diameter of posterior maxillary teeth (1).

198. Palatine, elongate lateral process projecting to lateral edge of orbit to articulate with caudal margin of prefrontal: absent (0); present (1).

199. Epipterygoid: present (0); absent (1).

200. Ectopterygoid: clasps pterygoid anteromedially (0); ectopteryoid overlaps pterygoid (1); ectopterygoid abuts pterygoid medially (2).

201. Vidian canals: enclosed in sphenoid (0); open intracranially (1).

202. Vidian canals: posterior openings symmetrical (0); asymmetrical (1).

203. Exoccipitals: separated ventral to foramen magnum (0); contact below foramen magnum (1).

204. Exoccipital-opisthotic: horizontal, winglike crista tuberalis absent (0); present (1).

205. Otoccipitals: do not project posteriorly to level of occipital condyle (0); project posteriorly to conceal occipital condyle in dorsal view (1).

206. Sclerotic ring: present (0); absent (1).

207. Dentary, enlarged mental foramen: absent (0); present (1).

208. Dentary, depth of Meckelian groove anteriorly: deep slot (0); shallow sulcus (1).

209. Dentary, angular process shape: posteroventral margin of dentary angular process weakly wrapped around underside of jaw (0); dentary angular process projects more nearly horizontally to wrap beneath jaw (1).

210. Dentary, angular process length relative to coronoid process: angular process disinctly shorter than coronoid process, former terminating well anterior to latter (0); subequal in length posteriorly (1).

211. Dentary, symphysis: weakly projecting medially (0); hooked inward and strongly projecting medially (1).

212. Dentary, ventral margin: unexpanded, medial margin of dentary straight in ventral view (0); expanded, medial margin crescentic in ventral view (1).

213. Dentary, coronoid process: wraps around surangular laterally and medially (0); broad and sits atop surangular (1).

214. Dentary, coronoid process with slot for medial tab of surangular: absent (0) or present (1).

215. Dentary, subdental shelf: present along entire tooth row (0); present only along posterior portion of tooth row (1); absent (2).

216. Dentary, enlarged mental foramen position: near tip of dentary (0); displaced from tip of jaw (1); displaced further to lie halfway between symphysis and surangular notch (2).

217. Surangular, dentary process with distinct triradiate cross-section: absent (0); present (1).

218. Surangular, adductor fossa: small (0); extended caudally towards jaw articulation (1).

219. Surangular: ventrolateral surface of surangular bearing distinct crest for attachment of adductor muscles: absent (0); present (1).

220. Coronoid, lateral overlap of coronoid onto dentary: absent (0); present (1).

221. Splenial attachment to dentary above Meckel’s canal: close throughout length (0); loose, with dorsal dentary suture confined to posterodorsal corner of splenial (1); (2) contact with subdental shelf reduced to small spur of bone or contact lost entirely.

222. Splenial – angular articulation: splenial overlaps angular (0); splenial abuts against angular to form hinge joint (1).

223. Splenial, size: splenial elongate, extends more than half distance from angular to dentary symphysis (0); splenial short, extends less than half distance from angular to symphysis (1).

224. Splenial, anterior mylohyoid foramen: present (0); absent (1).

225. Angular, lateral exposure (with coronoid region pointing dorsally): angular broadly exposed laterally along length (0); angular narrowly exposed laterally (1).

226. Angular, length posteriorly relative to glenoid (quadrate articulation): relatively long, extends more than half distance from anterior end of angular to glenoid; (0) relatively short, half or less of distance to glenoid (1); very short, one third or less of distance to glenoid (2).

227. Surangular, enlarged anterior surangular foramen: absent (0); or present (1).

228. Coronoid eminence: (0) well-developed; (1) weakly developed or absent.

229. Glenoid, shape: quadrate cotyle shallow (0), anteroposteriorly concave and transversely arched, ‘saddle shaped’ (1).

230. Retroarticular process: retroarticular process elongate (0) or shortened (1).

231. Ventral projections (peduncles) of anterior precloacals: short, about 50% length of centrum (0); long, subequal to or longer than centrum (1).

232. Vertebrae, ridgelike or bladelike ventral keels developed posterior to pedicles: (0) absent; (1) present.

233. Vertebrae, dorsolateral ridges of neural arch: (0) absent; (1) present.

234. Vertebrae, vertebral centrum: narrow in ventral view (0); broad and subtriangular in shape (1); broad and square (2).

235. Vertebrae, arterial grooves: absent in neural arch (0); present (1).

236. Vertebrae, posterior condyle: confluent with centrum ventrally (0); distinctly separated from centrum by groove/constriction between centrum and condyle (1).

237. Vertebrae: narrow, width across zygapophyses not significantly greater than distance from prezygapophyses to postzygapophyses (0); vertebrae wide, width across zygapophyses 150% of length or more (1).

*238. Vertebrae, zygosphene anterior margin: deeply concave anterior edge (0); shallowly concave anterior edge (1); straight or slightly sinuous anterior edge (2).

*239. Basioccipital, ventral surface: smooth (0); sagittal crest of parabasisphenoid extends into basiocciptal (1).

*240. Vertebrae, zygosphene width, expressed as ratio of zygosphene width to cotyle width, in anterior view: wide, ratio close to or more than 1 (0); narrow, ratio significantly less than 1 (1).

*241. Vertebrae, posteromedial notch of neural arch, expressed as ratio of postzygapophyses width to posterior embayment depth: slight embayment, ratio more than 12 (0); medium embayment, ratio between 12 and 6.5 (1); marked embayment, exposing largest part of condyle, ratio less than 6.5 (2).

*242. Vertebrae, constriction index, expressed as neural arch minimal width to total width, measured at the level of the prezygapophyseal lateral edge: slight constriction, ratio equal to or more than 0.67 (0); marked constriction, ratio less than 0.67 (1).

*243. Vertebrae, narrow and sharp haemal keel: absent (0); present (1).

*244. Vertebrae, cotyle size, expressed as ratio of cotyle width to total width (measured as the interdiapophyseal width): big cotyle, ratio more than 0.5 (0); middle-sized cotyle, ratio between 0.5 and 0.3 (1); small cotyle, ratio less than 0.3 (2*).*

*245. Vertebrae, small lateral ridge on precloacal vertebrae extending from the parapophyses, below lateral foramen: absent (0); present (1).

*246. Supraoccipital, shape of dorsal exposure: broad and square (0); wider than longer, with broad edges (rectangular) (1); wider than long, with pointed medial edges (2); diamond-shaped (3); ‘M’-shaped (4).

*247. Supraoccipital, size of dorsal exposure, expressed as ratio of supraoccipital length (measured at the midline) to parietal width (measured at the line delimited by the anterior borders of the prootic): big, ratio of 0.5 or more (0); small, ratio clearly less than 0.5 (1).

*248. Vertebrae: unfused intercentra in precloacal vertebrae posterior to the axis: present (0); absent (1).

**Changes from previous matrices**

**Selected character additions**

**Character 238**. Vertebrae, zygosphene anterior margin:

(0) deeply concave anterior edge, (1) shallowly concave anterior edge, (2) straight or slightly sinuous anterior edge (2).

Character and character states are taken from Lee & Scanlon 2002.

**Character 239**. Basioccipital, ventral surface:

(0) smooth, (1) sagittal crest of parabasisphenoid extends into basiocciptal.

The ventral aspect of the braincase can present a prominent median keel from the parabasisphenoid, which extends into the basioccipital, present in madtsoiids and macrostomatans (Wilson *et al*. 2010).

**Character 240**. Vertebrae, zygosphene width, expressed as ratio of zygosphene width to cotyle width, in anterior view:

(0) wide, ratio close to or more than 1, (1) narrow, ratio significantly less than 1.

Character and character states are taken from Vasile *et al.* 2013.

**Character 241**. Vertebrae, posteromedial notch of neural arch, expressed as ratio of postzygapophyses width to posterior embayment depth:

(0) slight embayment, ratio more than 12, (1) medium embayment, ratio between 12 and 6.5 (2) marked embayment, exposing largest part of condyle, ratio less than 6.5.

Character and character states are taken and modified from Vasile *et al.* 2013.

**Character 242**. Vertebrae, constriction index, expressed as minimal neural arch width to total width, measured at the level of the prezygapophyseal lateral edge:

(0) slight constriction, ratio equal to or more than 0.67, (1) marked constriction, ratio less than 0.67.

Character and character states are taken from Vasile *et al.* 2013.

**Character 243**. Vertebrae, narrow and sharp haemal keel:

(0) absent, (1) present.

Character and character states are taken from Vasile *et al.* 2013.

**Character 244**. Vertebrae, cotyle size, expressed as ratio of cotyle width to total width (measured as the diapophyses width):

(0) big cotyle, ratio more than 0.5, (1) middle-sized cotyle, ratio between 0.5 and 0.3, (2) small cotyle, ratio less than 0.3.

The width between diapophyses is used to estimate the total width of the vertebrae, as it reflects more the overall size, as in some derived forms the prezygapophyses exhibit a great lateral expansion that over-estimates the relative size (e.g., *Trachyboa*).

State 2 is restricted to *Najash rionegrina* (holotype and MPCA 418).

**Characters 245**. Vertebrae, small lateral ridge on precloacal vertebrae extending from the parapophyses, below lateral foramen:

(0) absent, (1) present.

State 1 is restricted to *Najash rionegrina* (holotype and MPCA 418).

**Character 246**. Supraoccipital, shape of dorsal exposure:

(0) broad and square, (1) wider than longer, with broad edges (rectangular), (2) wider than long, with pointed medial edges, (3) diamond-shaped, (4) ‘M’-shaped.

**Characters 247.** Supraoccipital, size of dorsal exposure, expressed as ratio of supraoccipital lenght (measured at the midline) to parietal width (measured at the line delimited by the anterior borders of the prootic):

(0) big, ratio of 0.5 or more, (1) small, ratio clearly less than 0.5.

**Characters 248**. Vertebrae: unfused intercentra in precloacal vertebrae posterior to the axis:

(0) present, (1) absent.

Based on recent studies dealing with the homology of the intercentrum system of snakes (Caldwell & Calvo 2008; Garberoglio *et al*. 2017; Palci *et al*. 2013), *Dinilysia*, *Najash* and *Haasiophis* are scored as possessing unfused intercentra in anterior precloacals (cervicals) posterior to the axis.

**Selected scoring changes**

**Character 66.** *Yurlunggur* is scored as "1".

**Character 85.** Changed from "0" to "1" in *Dinilysia*, as the otoccipital posterolateral processes show the same condition found in *Najash* and madtsoiids.

**Character 115**. Chevron bones (caudal intercentra) are present in *Dinilysia* (changed from "1" to "0"), while in *Najash*, although not preserved, the morphology of the caudal peduncles suggest their presence therefore is changed from "1" to "?" (Garberoglio *et al.* 2017).

**Character** **116**. Changed to "1" for the Anguimorph root, as the haemapophyses of snakes are considered to be homologous to the posteroventral peduncles in the caudal vertebrae of lizards (Garberoglio *et al.* 2017).

**Character** **119**. Prezygapophyseal processes are considered to be absent in the vertebrae of *Dinilysia,* changed from "1" to "0".

**Character** **120**. Subcentral paralymphatic fossae are present on posterior precloacal vertebrae of *Najash*, changed from "?" to "1".

**Character** **125**. *Najash* is changed from "1" to "0" as the middle precloacals show that the vertebrae bear a well-developed neural spine, not a low ridge or absent as considered before.

**Character** **170**. *Najash* is changed from "1/2" to "2" as the new specimen shows that the parietal crest is extended anteriorly and posteriorly, clearly extended from at least more than 50% of the parietal midline length.

**Character 209**. This character is changed from to ''0" to "?" in *Najash*, as it cannot be seen clearly in the incomplete dentary of the holotype.

**Character** **236**. Changed from "0" to "1" in both *Dinilysia* and *Najash*, as they both have vertebrae with condyles clearly separated from the centrum by a distinct constriction/groove.

**Figures of selected characters**

**
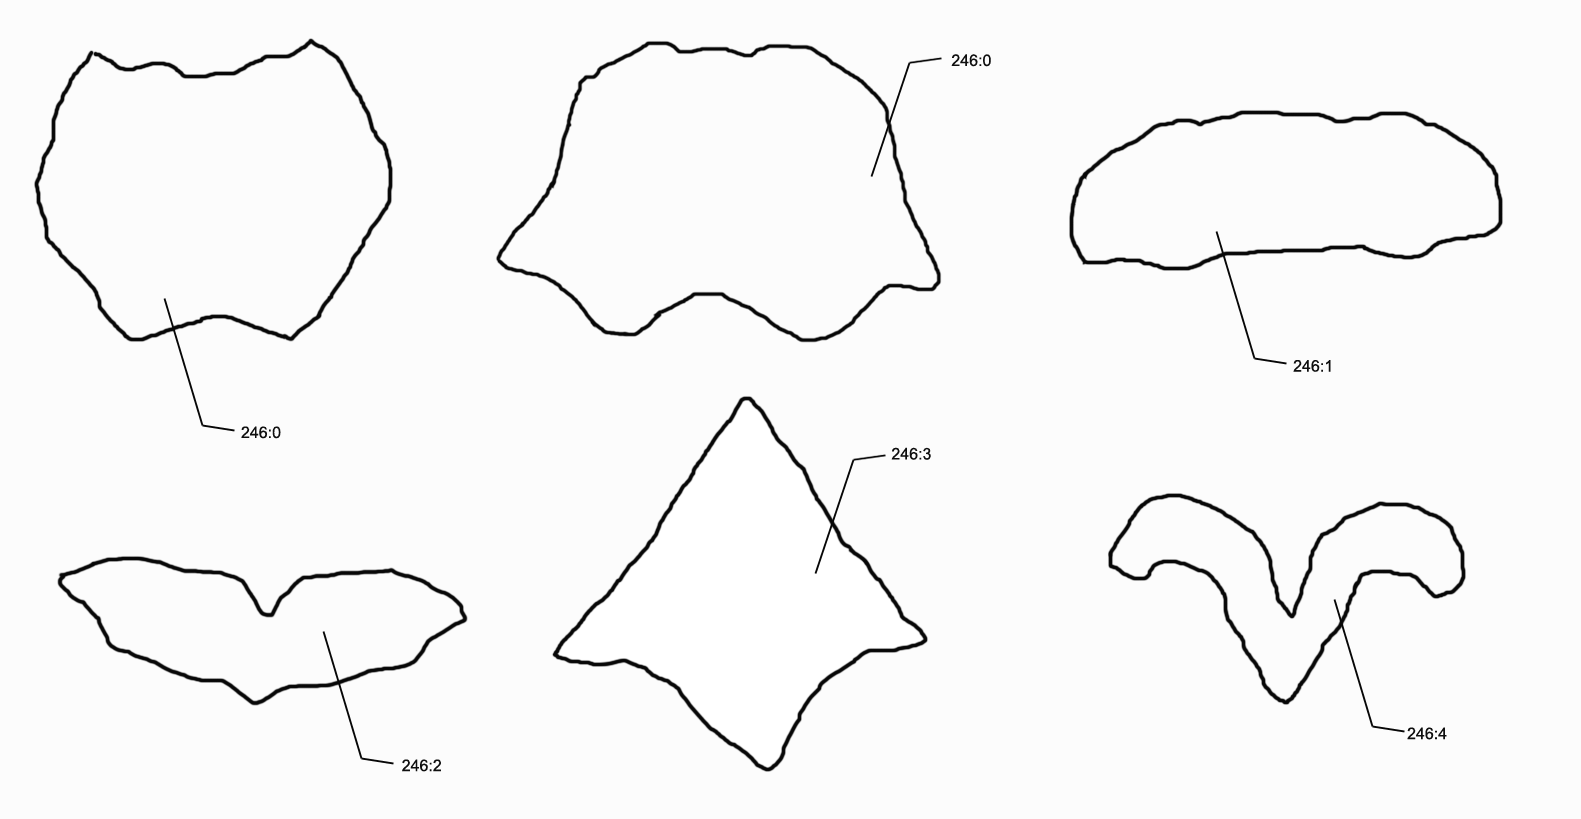
**

**Figure S2.** Character 246**.** A) *Heloderma* TMP 1990.7.2, B) *Varanus salvator* TMP 1990.7.36, C) *Xenopeltis unicolor* USNM 281277, D) *Dinilysia patagonica* MACN-RN 1014, E) *Najash* *rionegrina* MPCA 418, E) Boa constrictor ZFMK 54844.

**Data matrix in nexus format**

#NEXUS

BEGIN TAXA;

DIMENSIONS NTAX=31;

;

END;

BEGIN CHARACTERS;

DIMENSIONS NCHAR=248;

FORMAT DATATYPE = STANDARD GAP = - MISSING = ? SYMBOLS = " 0 1 2 3 4";

MATRIX

Anguimorph_root 00001(01)0001?00(03)0?0000010000000(01)0000010000?00010000-000000000?00000000100010100000?100?0000?0000000-000000000000000001000(01)(01)0000000?00(01)0000000000000000(01)0000?0000000000000000000000000000(01)0000000(01)0-0000000000000000100000-00000000000000000(01)000-(01)-(12)10(01)000(01)

Najash 11??1?????????????????????????????????0??1000?????01?0????????????0???????0???0101001000000???0(01)0000?110????0??????101011?100011100001?1?000110????10?????1??????????????200?0???????????????????????????0010?10???0??20????1?????????011111020000121300

Najash_Holotype 11??1???????????????????????????????????????????????????????????????????????????????????????????????????????0??????101011?100011100001?1?000110???????????1???????????????????????????????????????????????????10???0??20????1?????????011111020000121??0

MPCA_385 ??????????????????????????????????????0??1000?????0??0????????????0???????0???010?00?000000???00?000?110???????????????????????????????????????????1?????????????????????200?0???????????????????????????0???????????????????????????????????????????30?

MPCA_418 ??????????????????????????????????????0??1000?????01?0????????????????????0???0101?01000?00???01000????0????????????01011?1?001????00??1???????????10????????????????????200?0???????????????????????????0010???????????????????????????11110?0??012130?

Scolecophidia 11(12)1101110?1010??000??00???0000211(01)??000?11?11?(01)1?000(01)0(01)020---1(01)0?01000000111112100100000?0?02000010111(01)010000000110001120(01)(01)10(01)01(12)11011111(01)11101??1110(01)0(01)(01)10001100000111101010?0011112111000011--1(01)0--1-10000111?0(01)0102(02)000121110(02)10(01)1110010020001010(13)11

Dinilysia 112?111??1?100??????0?0102100000100100100100110100000000?01?00000000000010001101010110000001(01)100000?11100120?00001010101(01)01?00(01)010?101?1???????001000000001???????000112020010011111111110100001-1100010000-01101010101100011100111011011111100000010210

Sanajeh 111??????????????????????2??????1?????0??10?01020?00?0?0??1???1??????1????????01?1111100??0???12?10????1?12?1????1??010???1?0111???001?1???????????11?????????1???????????01?0???????????????????????????0?1??1??0?????1???1??????????1111??1?1?01???30?

Wonambi 112?111?????0?????????0??2?????1?????010110011120011?010101?011101?0?1????????0101111000000011121101?111?1201?0??101010?111?01111??001?1????120????11?0???1??01???00?11202011??11101111110100?0?????10?-00110?111011111110011???111010111111111110010???

Yurlunggur 112111101??103??0?01000001?00?1110010011010??1020001?01010100111010011?010????01011?1?000?00111211011111?12?0????1??010111100111???001(01)1???????10?011001??1??01110000112020110?11101??1110??0001?11010?000110???10??1?1?????1?00??????11111111101001040?

Anilius 11101110000100200001001011100011111?1001010?1101000000100110011111000000101111010001001100010210000110101110120011110111101010101111011111111101110111011111000110100112120010011111121111110111-110001110000111111000201101??10??1011110011020011010201

Uropeltidae 11111(01)(01)0(01)(01)010(01)100(01)0100100110001111(01)01001010?110(12)00000(01)(01)00110010111000(01)00101111(01)1000100010001021(01)(01)0(01)(01)111011(12)01200111101111010101011110111111111011101110111110(01)0110(01)001121(02)(01)01001(01)(01)1112111(01)11(01)11--1101011101001111(01)00(01)(01)20(01)001111(01)(01)2101111001(01)020001010211

Pachyrhachis 112??11?1??10?????????00???00???11011??0?11??112???0101??11??????10111?111?20?1??????????1??????????10???120110001??0101111?001?121111?11011110???????0???1????110?001???2??1???1?1???1?1????1-?-1011????????111?0?1???1?111?????1?01111021?1?0?100?????

Haasiophis 112?111?1??10???????0?00???00???110110?1?11?01121?00101??11?11??11?111?011????1????0????11?????1?0??10???120110001010101111?10??121?11011011110???????01111???11?0?0011??(1 2)101?0??1????1??????10?-1011????????111?0????20???111101?101111?2??1?0???0??300

Eupodophis 112?011?1??10????????????1???????1011????1???1101???1011?11????2?101???1?1????1????????????????1????1????120110001010001111?00??0?1111111011?10???????0???1???11??????1??????????1?1??1??????1????011????????1?1??????1???????1????0?11112??1001???1????

Xenopeltis 11200110110102200101001103100011111??00101110202000010110110011111111100100011110101000101010111000110012120120111110111101110101211010111----1111111101111101111101111211101110?110?2111-11110-01111111000001111010102011112111121111110011020021110101

Loxocemus 11200110110102100101001102100011100010010111020200101011011001111111110010121011010100(01)10101011101111001212012011111011110111010121101011111?201111111011111011111001112111011111111?2111111010201011111010001111111112011011111111011110111120021010111

Erycinae 1121011111011(01)1011011011012(01)10111(01)0(01)1100111(01)(12)211101010(01)1011111121111(01)10011120012011100(01)1011(01)?11(12)0(01)011(01)01012112011111011110100110121101011111220111111101111110211100011(12)11101(0 1)11?111?211111101(01)-11011012110011111110112111(01)121101(12)10111001111(12)0011010111

Ungaliophiidae 11210110110110201101101(01)0120101111001100111?021(02)1000101101111112(01)111010011120012010100010111011000111001?1211?1-2111011110100110121101011111220111111101??11(0 1)0111100011211111111111112111111011-0101101211001111111111211111211112101111001102002101011?

Boinae 1121011(01)11011(01)2011011011(01)1211011110111(01)0111122121011101(12)011111120111110011120012111(01)00(01)1111011120101100121211201111101111(01)100110121101011111220111111101111110211101011212111111111112111111110-110110121100111111101121111111101210111101111(1 2)1021110411

Pythoninae 112(01)011(01)11010020010110111121101110011100111?0212101110120111(01)1021111110011120012111100(01)101(01)00112(01)1011001212112011111011110100110121101011111220111111101111110211101011212111111111112111111010211011012110011111110112111111111111011111111121011110411

Tropidophiidae 1121011111011320010100110110111111011100111?021011101010011101121111010011120012011101110111011100111001?1211201211111111110011011110101111122(01)111111111111110111100011211111111?111?2111111110-01011011100011111011112211112110121111110011020011110111

Bolyeriidae 1121011011011320010100110110101111011100111?02120010101101110112111101001112011201110001011??110001110012121120111110111111001101211010111----1111111101111110111100011211111111?111?2111110110-010110111000111111111120(01)1112110121(01)111100110?00??11?(12)11

Acrochordidae 1121011110111310011211111200111111011110?11?02121110101001110112011111102112001???010111011101110011100101201?1-21111111111(01)01101211010(01)11----1111111111??1110111100011110111001?111?2111110110-110110110000011010?1111210?12110121111110111020011010??1

Basal_Colubroides 112101101(01)(01)113110112111(01)0(02)(01)(01)111111(01)01100111?021(012)(01)1101010011101020111(01)1102113001211110111011(01)(01)1(01)0001110(01)101211-1-211111110110(01)1101211010111----1111111111??1110111100011211111111?111?21110-1110-110110110000111110111022110121101211101100111?(01)????1?111

Coniophis 111?1?????????????????????????????????????????0?????????????????????????????????????????????????????????????????????0001201?10(01)01??10?????????????????????1??0????????????????????0???????????????????????????11????1?10??????????????01001001?001010???

Parviraptor_estesi 112?1?1??????????????????????????????????????10101????????????????????????????????????????????????????????????????????????????????????????????????????????1??0?????????????????11??012???0-?????????????????????????????????????????????????????????????

Portugalophis_lignites 112?1?1??????????????????????????????????????10101??????????????????????????????????????????????????????????0?????????????????????????????????????????????1??00????????????????11?0012???0-1??????????????????101??0??0?????????????????????????????????

Diablophis_gilmorei 112?1????????????????????????????????????????1??01??????????????????????????????????????????????????????????0????????1000?0?001????10?????????????????????1??0?????????????????1???012???0-???????????????????101??0??0????????????????0001102?100000???

Eophis_woodwardi 1???1????????????????????????????????????????????????????????????????????????????????????????????????????1??0?????????????????????????????????????????????1???????????????????????????????????????????????????101?00??0?????????????????????????????????

aff.Parviraptorestesi ??????????????????????0???????0??0???????????????????????????????????????????????????????????????????????????????????1000?0?001????10????????????????1?????????????????????????????????????????????????????????????????????????????????000?102????0?0???

;

END;

BEGIN ASSUMPTIONS;

TYPESET * UNTITLED = unord: 1 - 248;

**Institutional abbreviations**

**MACN**: Museo Argentino de Ciencias Naturales ‘Bernardino Rivadavia’, Buenos Aires, Argentina**.; MPCA**: Museo Provincial Carlos Ameghino, Cipolletti, Río Negro, Argentina.; **TMP**: Tyrell Museum of Paleontology, Drumheller, Alberta, Canada.; **USNM**: National Museum of Natural History, Washington, D.C., U.S.A.; **ZFMK**: Zoologisches Forschungsmuseum Alexander Koenig, Bonn, Germany.

**Additional references**

**Caldwell, M.W. & Calvo, J.** 2008. Details of a new skull and articulated cervical column of *Dinilysia patagonica* Woodward, 1901. *Journal of Vertebrate Paleontology*, **28** (2), 349-362.

**Caldwell, M.W., Nydam, R.L, Palci A. & Apesteguía, S.** 2015. The oldest known snakes from the Middle Jurassic-Lower Cretaceous provide insight on snake evolution. *Nature communications*, **6** (5996), 1–11.

**Garberoglio, F.F., Gómez, R.O., Simões, T.R., Caldwell, M.W. & Apesteguía, S**. 2017. The caudal intercentrum system (CIS) of fossil and living snakes revealed by a new specimen of *Dinilysia* *patagonica.* Society of Vertebrate Paleontology 77th annual meeting, *Program and abstracts*, 116–117.

**Lee, M.S.Y. & Scanlon, J.D.** 2002. Snake Phylogeny based on osteology, soft anatomy and ecology. *Biological Reviews,* **77** (03), 333–401.

**Palci A., Caldwell, M.W. & Nydam, R.L**. 2013. Reevaluation of the anatomy of the Cenomanian (Upper Cretaceous) hind-limbed marine fossil snakes *Pachyrhachis*, *Eupodophis*, and *Haasiophis*. *Journal of Vertebrate Paleontology,* **33** (6), 1328–1342.

**Vasile, S., Csiki-Sava, Z. & Venczel, M**. 2013. A new madtsoiid snake from the Upper Cretaceous of the Haţeg Basin, western Romania. *Journal of Vertebrate Paleontology*, **33** (5), 1100-1119.
